# Supplementary material
Source: Springer Nature journal article supplement (https://www.springermedizin.de/resource/supplementary/13048_2013_187_MOESM2_ESM.pdf/9665086)
Supplement: MOESM2 [file 9665086]

## VSELs in Gonads

Self-renewal

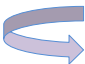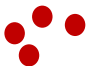

Asymmetric cell division

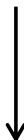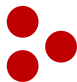

Spermatogonial  
stem cells

Ovarian  
stem cells

Undergo clonal expansion  
and cysts formation

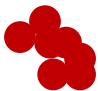

Differentiation

Differentiation

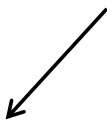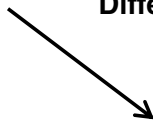

Spermatogenesis  
(Sperm)

Oogenesis  
(Oocytes)
